# Supplementary material for: Dual-Functional Nanofibrous Patches for Accelerating Wound Healing
Source: MDPI journal article supplement (doi:10.3390/ijms231810983), 2022-09-19
Supplement: s1 [file s1]

# Supplementary Materials

## Figures

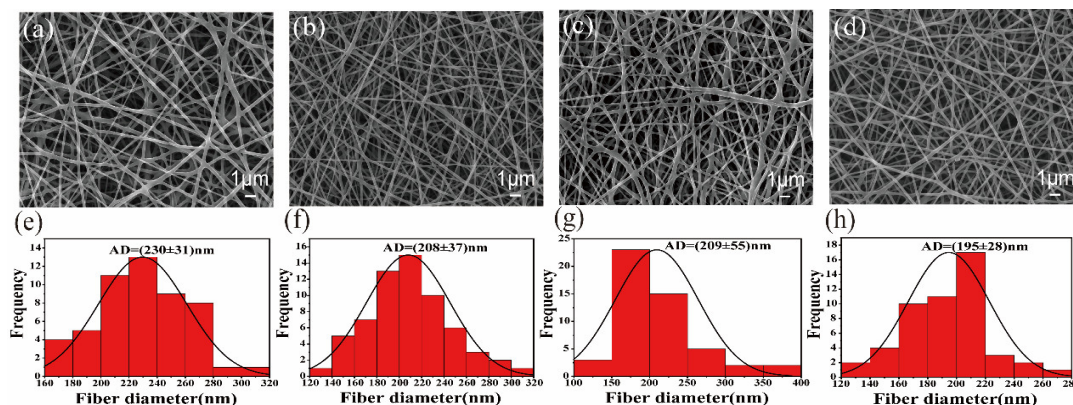

**Figure S1.** (a–d) SEM images and (e–h) corresponding diameter distribution of different coaxial nanofibers after the glutaraldehyde crosslinking; (a,e) PCL/GEL, (b,f) PCL-CUR/GEL, (c,g) PCL/GEL-TH, (d,h) PCL-CUR/GEL-TH.

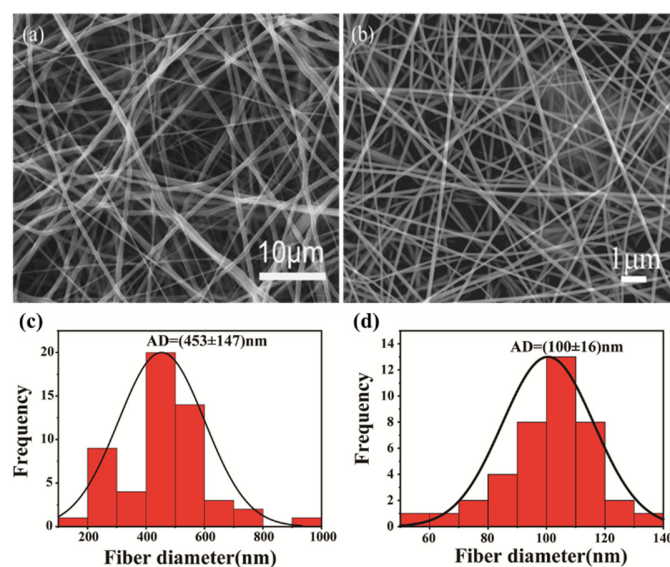

**Figure S2.** (a,b) SEM images and (c,d) corresponding diameter distribution of (a,c) single PCL and (b,d) GEL nanofiber mats.

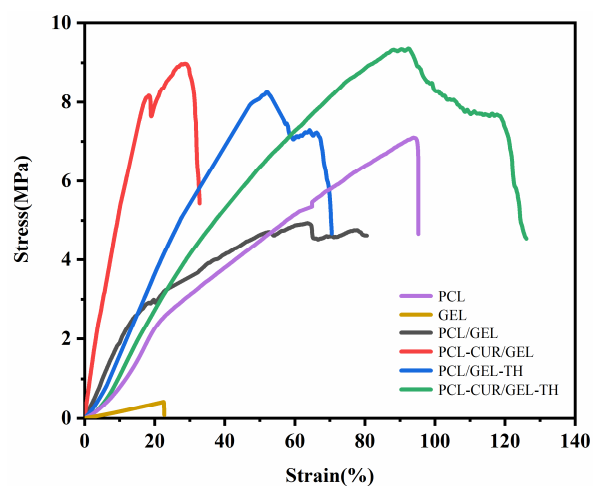

**Figure S3.** Stress-strain curve of different nanofiber mats in swollen conditions.

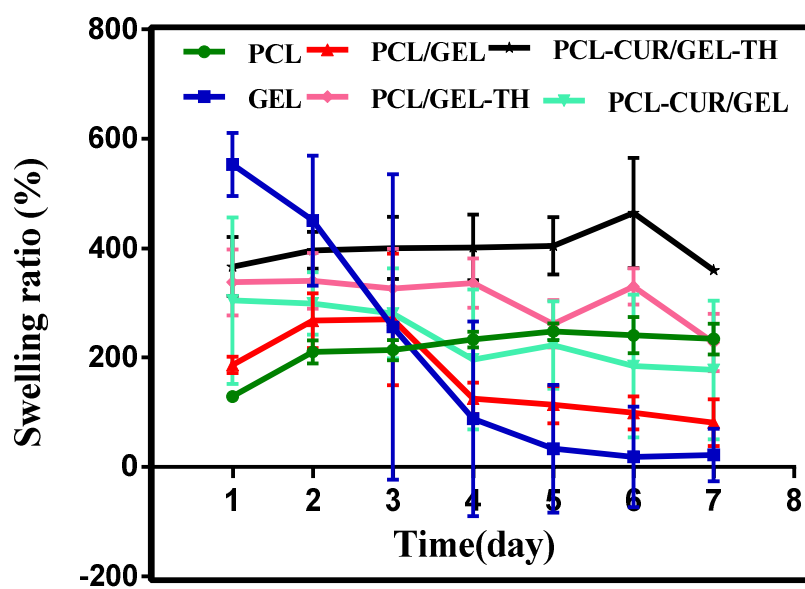

**Figure S4.** Swelling ratio of different nanofiber mats for 7 days.

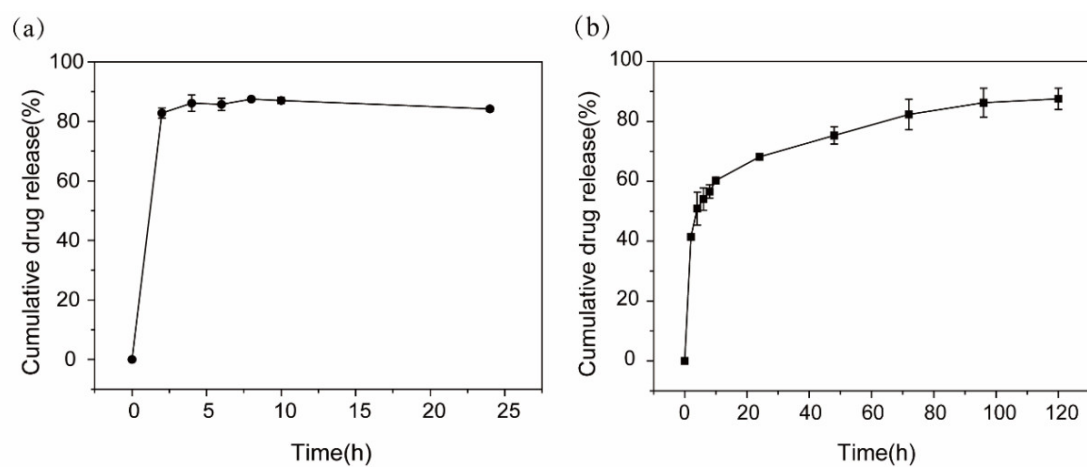

**Figure S5.** In vitro release profiles of drugs at different time, (a) TH; (b) Cur.

## Tables

**Table S1.** The wavenumber of the main bands for different samples.

| Samples        | Wavenumber (cm <sup>-1</sup> ) | Functional Group        |
|----------------|--------------------------------|-------------------------|
| PCL            | 1240, 1165                     | C-O-C                   |
|                | 1725                           | -C=O                    |
| GEL            | 1647                           | Amide I                 |
|                | 1548                           | Amide II                |
| Cur            | 2949, 2865                     | -CH <sub>2</sub>        |
|                | 1430                           | C-H                     |
|                | 1510                           | -C-C                    |
|                | 1600                           | -C=O                    |
|                | 1277                           | C-O                     |
|                | 3510                           | Phenolic hydroxyl group |
|                | 1613                           | -C=O                    |
| TH             | 1579                           | NH <sub>2</sub>         |
|                |                                |                         |
| PCL/GEL        | 1240, 1165                     | C-O-C                   |
|                | 1725                           | -C=O                    |
|                | 1647                           | Amide I                 |
|                | 1548                           | Amide II                |
| PCL-CUR/GEL    | 2949, 2865                     | -CH <sub>2</sub>        |
|                | 1240, 1165                     | C-O-C                   |
|                | 1725                           | -C=O                    |
|                | 1647                           | Amide I                 |
| PCL/GEL-TH     | 1548                           | Amide II                |
|                | 2949, 2865                     | -CH <sub>2</sub>        |
|                | 1240, 1165                     | C-O-C                   |
|                | 1725                           | -C=O                    |
| PCL-CUR/GEL-TH | 1647                           | Amide I                 |
|                | 1548                           | Amide II                |
|                | 2949, 2865                     | -CH <sub>2</sub>        |
|                | 1240, 1165                     | C-O-C                   |
| PCL-CUR/GEL-TH | 1725                           | -C=O                    |
|                | 1647                           | Amide I                 |
|                | 1548                           | Amide II                |
|                | 2949, 2865                     | -CH <sub>2</sub>        |

**Table S2.** The mechanical parameters of different samples.

| Samples        | Tensile Strength<br>(MPa) | Elongation at<br>Break (%) | Elastic Modulus<br>(MPa) |
|----------------|---------------------------|----------------------------|--------------------------|
| GEL            | 5.59 ± 0.74               | 13.53 ± 6.40               | 591.30 ± 24.00           |
| PCL            | 8.48 ± 3.78               | 122.22 ± 8.46              | 74.32 ± 26.59            |
| PCL/GEL        | 9.16 ± 1.24               | 39.31 ± 5.98               | 759.75 ± 79.42           |
| PCL-CUR/GEL    | 3.04 ± 1.11               | 41.66 ± 10.14              | 430.99 ± 81.87           |
| PCL/GEL-TH     | 12.96 ± 3.51              | 68.68 ± 32.40              | 1276.78 ± 136.51         |
| PCL-CUR/GEL-TH | 9.58 ± 1.78               | 139.10 ± 7.12              | 66.42 ± 9.50             |

**Table S3.** Electrospinning parameters for single and coaxial nanofiber mats.

| Samples                    | Needle              | Voltage (kV) | Push Speed<br>(mm/min)  | Distance between Needle<br>and Receiver (cm) |
|----------------------------|---------------------|--------------|-------------------------|----------------------------------------------|
| GEL                        | 21                  | 8-10         | 0.1                     | 12-15                                        |
| PCL                        | 21                  |              | 0.1                     |                                              |
| Coaxial<br>electrospinning | Core:21<br>Shell:15 |              | Core:0.02<br>Shell:0.04 |                                              |
